# Supplementary material for: Sulfonic acid functionalized ionic liquids for dissolution of metal oxides and solvent extraction of metal ions
Source: Royal Society of Chemistry journal article supplement (doi:10.1039/c5cc02731d), 2015-01-01
Supplement: c5cc02731d1.pdf [file c5cc02731d1.pdf]

Electronic Supporting Information

**Sulfonic acid functionalized ionic liquids for the dissolution of metal oxides and  
solvent extraction of metal ions**

David Dupont<sup>†</sup>, Stijn Raiguel<sup>†</sup>, Koen Binnemans<sup>\*†</sup>

---

## 1. Chemicals and materials

### Chemicals for extraction and leaching experiments

NiO (97%), Y<sub>2</sub>O<sub>3</sub> (99.99%), CrCl<sub>3</sub>·6H<sub>2</sub>O (98%), ZnCl<sub>2</sub> (98.5%), CuCl<sub>2</sub> anh. (99%), H<sub>2</sub>SO<sub>4</sub> (96%), HCl (37%), 1,4-dioxane (99.9%), Al<sub>2</sub>O<sub>3</sub> (99%), Cr<sub>2</sub>O<sub>3</sub> (99%) and LaCl<sub>3</sub>·7H<sub>2</sub>O (99.99%) were purchased from Acros Organics (Geel, Belgium). La<sub>2</sub>O<sub>3</sub> (99.99%), Fe<sub>2</sub>O<sub>3</sub> (95%), TiO<sub>2</sub> (99%), GaCl<sub>3</sub> anh. (99.99%), NiCl<sub>2</sub> (98%), InCl<sub>3</sub> (97%), FeCl<sub>3</sub> (99%), YCl<sub>3</sub>·6H<sub>2</sub>O (99.9%), DyCl<sub>3</sub>·6H<sub>2</sub>O (99.9%), CoCl<sub>2</sub> (97%), MnO (99%) and LuCl<sub>3</sub>·6H<sub>2</sub>O (99.9%) were bought from Sigma-Aldrich (Diegem, Belgium). NdCl<sub>3</sub>·6H<sub>2</sub>O (99.9%) and Co<sub>3</sub>O<sub>4</sub> (99.5%) were purchased from Strem Chemicals Inc. (Newburyport, USA), SnCl<sub>2</sub> (99%) from Merck (Overijse, Belgium) and WO<sub>3</sub> (99%) from ABCR Chemicals (Karlsruhe, Germany). CaCl<sub>2</sub>·2H<sub>2</sub>O (99.5%) and the 1000 mg·L<sup>-1</sup> gallium(III) and selenium(VI) standard solutions in HNO<sub>3</sub> (2–5 wt%) were obtained from Chem-Lab (Zedelgem, Belgium). Ethanol (Analytical reagent grade) was obtained from Fisher Scientific Limited (Loughborough, UK). CuO (99.9999%) and CoO (95%) were purchased from Alfa Aesar (Karlsruhe, Germany). A silicone solution in isopropanol was purchased from SERVA Electrophoresis GmbH (Germany). All chemicals were used as received without further purification.

Sc<sub>2</sub>O<sub>3</sub> was kindly provided by Solvay (La Rochelle, France). ScCl<sub>3</sub>·xH<sub>2</sub>O was prepared by dissolving Sc<sub>2</sub>O<sub>3</sub> in an excess of hydrochloric acid (two equivalents). The mixture was dried on a rotary evaporator to remove the water together with the excess of hydrochloric acid. This step was repeated several times until a crystalline material was obtained, the purity was verified with TXRF analysis.

### **Chemicals for ionic liquid synthesis**

Bistriflimic acid (80 wt% in H<sub>2</sub>O) (99%) was purchased from IoLiTec (HeilBronn, Germany). Triethylamine (99%), trioctylphosphine (90%) and trimethylamine (33% in EtOH) were purchased from Acros Organics (Geel, Belgium). Triphenyl phosphine (98.5%), 1,3-propanesultone (98%), tri-*n*-butylphosphine (97%), trioctylamine (98%), trihexylamine (96%), tributylamine (99%), tripropylamine (98%), ethylacetate (99.7%), toluene (99%) and diethylether (99.8%) were obtained from Sigma Aldrich (Diegem, Belgium). Trihexyl phosphine (95%) was bought from TCI (Zwijndrecht, Belgium). Acetonitrile (HPLC grade) and sodium hydroxide (97%) were obtained from Fisher Scientific Limited (Loughborough, UK).

## 2. Equipment and characterization

$^1\text{H}$  NMR and  $^{13}\text{C}$  NMR spectra were recorded on a Bruker Avance 300 spectrometer (operating at 300 MHz for  $^1\text{H}$ , 75 MHz for  $^{13}\text{C}$ ). The chemical shifts are noted in parts per million (ppm), referenced to tetramethylsilane for  $^1\text{H}$  and  $^{13}\text{C}$ . The coupling constants are given in Hertz. Solutions were made in  $\text{D}_2\text{O}$ ,  $\text{CD}_2\text{Cl}_2$  or  $\text{CD}_3\text{Cl}$ . The spectra were analyzed with SpinWorks software. The elemental analysis of carbon, hydrogen and nitrogen was performed on a CE-instruments EA-1110 elemental analyzer. The viscosity of the ionic liquids was measured using an automatic Brookfield plate cone viscometer, Model LVDV-II CP (Brookfield Engineering Laboratories, USA). Melting points were determined on a Mettler-Toledo DSC 1 (STAR<sup>e</sup> system) instrument at a heating rate of  $10\text{ }^\circ\text{C min}^{-1}$  under a helium atmosphere. Thermogravimetric analysis (TGA) was done on a TA Instruments T500 thermogravimeter (heating rate:  $5\text{ }^\circ\text{C min}^{-1}$  from room temperature to  $400\text{ }^\circ\text{C}$ , under a nitrogen atmosphere). A TMS-200 thermoshaker (Nemus Life) was used to shake samples during extraction experiments and a Heraeus Megafuge 1.0 centrifuge was used to accelerate phase separation. Total reflection X-ray fluorescence (TXRF) analysis was performed with a Bruker S2 Picofox TXRF spectrometer equipped with a molybdenum source. For the sample preparation, plastic microtubes were filled with a small amount of sample (100 mg), internal standard (Ga(III) or Se(VI) solution) and water (800  $\mu\text{L}$ ). To measure the ionic liquid, a smaller sample was taken (25 mg) and dissolved in 1,4-dioxane/water (800  $\mu\text{L}$ ). The microtubes were then vigorously shaken on a vibrating plate (IKA MS 3 basic). Finally, a 1  $\mu\text{L}$  drop of this solution was put on a quartz plate, previously treated with a silicone/isopropanol solution (Serva<sup>®</sup>) to avoid spreading of the sample droplet on the quartz plate. The quartz plates were then dried for 30 min at  $60\text{ }^\circ\text{C}$  prior to analysis. Each sample was measured for 5 min.

### 3. Overview of the synthetic strategy and the synthesized ionic liquids

The synthetic strategy for was based on a 2-step reaction (Scheme S 1). First 1,3-propanesultone was reacted with the appropriate trialkylamine or trialkylphosphine to obtain the sulfonate zwitterion. Then this zwitterion was reacted with the super acid HTf<sub>2</sub>N to obtain the corresponding ionic liquid (IL). An overview of the synthesized ILs is given in Table S1.

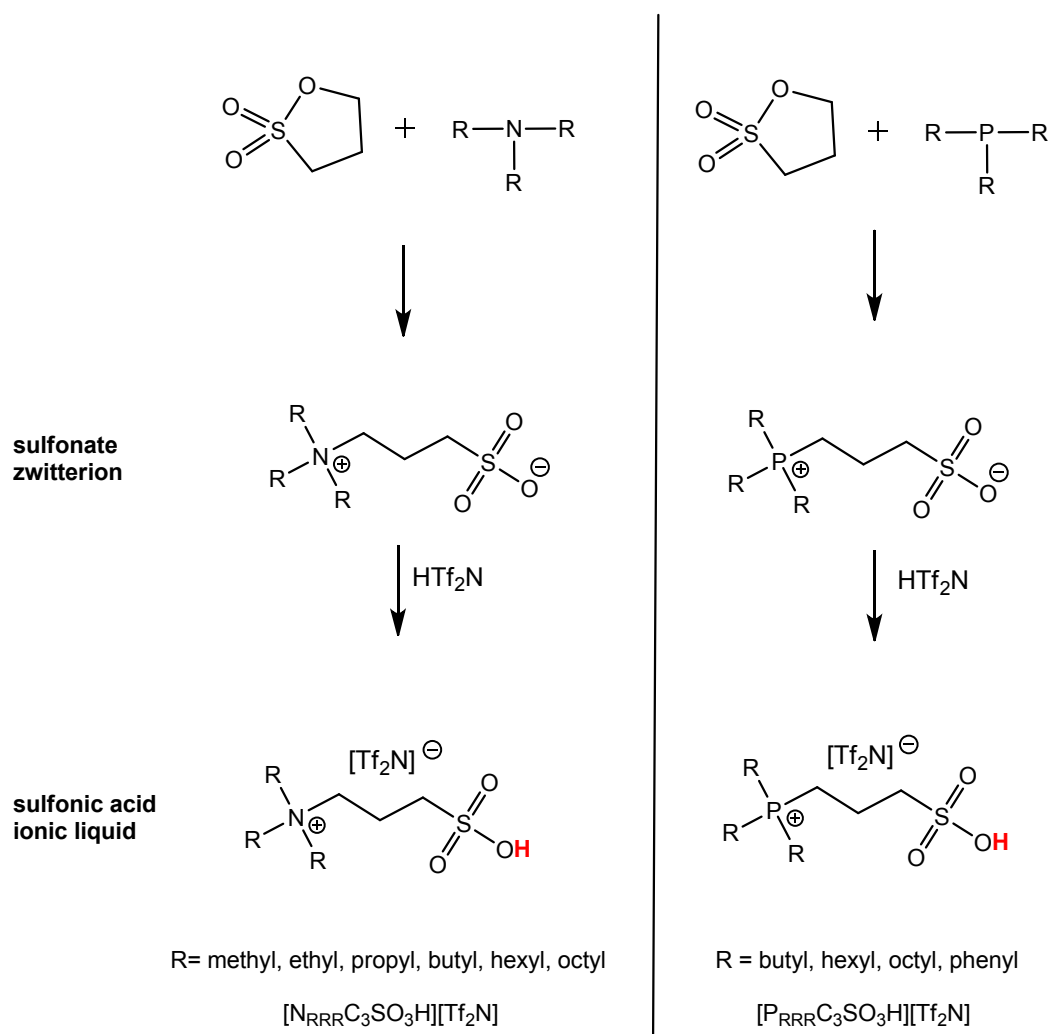

Scheme S 1. Synthetic strategy for the synthesis of trialkylammonium- and trialkylphosphoniumpropanesulfonic acid bis(trifluoromethylsulfonyl)imide ionic liquids.

Table S1. Overview of the ionic liquids synthesized in this work

| <b>IL abbreviation</b>                                                 | <b>Full name</b>                                                      |
|------------------------------------------------------------------------|-----------------------------------------------------------------------|
| [N <sub>111</sub> C <sub>3</sub> SO <sub>3</sub> H][Tf <sub>2</sub> N] | Trimethylammoniumpropanesulfonic acid bistriflimide <sup>(a)</sup>    |
| [N <sub>222</sub> C <sub>3</sub> SO <sub>3</sub> H][Tf <sub>2</sub> N] | Triethylammoniumpropanesulfonic acid bistriflimide <sup>(a)</sup>     |
| [N <sub>333</sub> C <sub>3</sub> SO <sub>3</sub> H][Tf <sub>2</sub> N] | Tripropylammoniumpropanesulfonic acid bistriflimide <sup>(a)</sup>    |
| [N <sub>444</sub> C <sub>3</sub> SO <sub>3</sub> H][Tf <sub>2</sub> N] | Tributylammoniumpropanesulfonic acid bistriflimide <sup>(a)</sup>     |
| [N <sub>666</sub> C <sub>3</sub> SO <sub>3</sub> H][Tf <sub>2</sub> N] | Trihexylammoniumpropanesulfonic acid bistriflimide <sup>(a)</sup>     |
| [N <sub>888</sub> C <sub>3</sub> SO <sub>3</sub> H][Tf <sub>2</sub> N] | Trioctylammoniumpropanesulfonic acid bistriflimide <sup>(a)</sup>     |
| [P <sub>444</sub> C <sub>3</sub> SO <sub>3</sub> H][Tf <sub>2</sub> N] | Tributylphosphoniumpropanesulfonic acid bistriflimide <sup>(a)</sup>  |
| [P <sub>666</sub> C <sub>3</sub> SO <sub>3</sub> H][Tf <sub>2</sub> N] | Trihexylphosphoniumpropanesulfonic acid bistriflimide <sup>(a)</sup>  |
| [P <sub>888</sub> C <sub>3</sub> SO <sub>3</sub> H][Tf <sub>2</sub> N] | Trioctylphosphoniumpropanesulfonic acid bistriflimide <sup>(a)</sup>  |
| [PPh <sub>3</sub> C <sub>3</sub> SO <sub>3</sub> H][Tf <sub>2</sub> N] | Triphenylphosphoniumpropanesulfonic acid bistriflimide <sup>(a)</sup> |

<sup>(a)</sup>Bistriflimide = bis(trifluoromethylsulfonyl)imide

## 4. Synthesis of ionic liquids

### 4.1 [N<sub>111</sub>C<sub>3</sub>SO<sub>3</sub>H][Tf<sub>2</sub>N]

1,3-Propanesultone (0.115 mol, 14.037 g) and trimethylamine (0.147 mol, 8.69 g) (as a 33% in ethanol solution) were dissolved in acetone at 0 °C. The solution was then stirred for 24 h at room temperature to obtain the sulfonate zwitterion [N<sub>111</sub>C<sub>3</sub>SO<sub>3</sub>] as a white powder precipitate. The acetone and excess trimethylamine were removed using a rotary evaporator under reduced pressure. The yield was 100% (0.115 mol, 20.87 g). A stoichiometric amount of the super acid HTf<sub>2</sub>N (0.115 mol, 32.33 g) was then added (as a 80 wt% solution in H<sub>2</sub>O) to the sulfonate zwitterion and the mixture was stirred for 2 h at 50 °C to obtain the sulfonic acid functionalized ionic liquid [N<sub>111</sub>C<sub>3</sub>SO<sub>3</sub>H][Tf<sub>2</sub>N], in quantitative yield. The product was dried using a Schlenk line.

### **Ionic liquid [N<sub>111</sub>C<sub>3</sub>SO<sub>3</sub>H][Tf<sub>2</sub>N]**

<sup>1</sup>H NMR (300 MHz, δ, D<sub>2</sub>O): 3.36 (2H, m, CH<sub>2</sub>), 3.02 (9H, s, 3 CH<sub>3</sub>), 2.86 (2H, t, 7.0 Hz, CH<sub>2</sub>), 2.13 (2H, m, CH<sub>2</sub>). <sup>13</sup>C NMR (75 MHz, δ, CD<sub>3</sub>Cl): 125.51 (CF<sub>3</sub>), 121.28 (CF<sub>3</sub>), 117.04 (CF<sub>3</sub>), 112.27 (CF<sub>3</sub>), 64.64 (CH<sub>2</sub>), 52.73 (CH<sub>3</sub>), 47.17 (CH<sub>2</sub>), 18.44 (CH<sub>2</sub>). CHN analysis: (calculated for C<sub>8</sub>H<sub>16</sub>F<sub>6</sub>N<sub>2</sub>O<sub>7</sub>S<sub>3</sub>): C 20.06% (20.78%), H 3.94% (3.49%), N 5.87% (6.06%).

Glass transition temperature (-48 °C)

Density: 1.57 g·cm<sup>-3</sup> (25 °C)

Viscosity 3230 cP (30 °C) / 180 cP (80 °C)

Degradation temperature: ≈ 275 °C

## 4.2 [N<sub>222</sub>C<sub>3</sub>SO<sub>3</sub>H][Tf<sub>2</sub>N]

Triethylamine (0.154 mol, 15.56 g) and 1,3-propanesultone (0.123 mol, 15.032 g) were dissolved in acetone at 0 °C. The solution was then stirred overnight at room temperature to obtain the sulfonate zwitterion [N<sub>222</sub>C<sub>3</sub>SO<sub>3</sub>] as a white powder precipitate. The precipitate was filtered off and washed with acetone to remove the excess trimethylamine. The precipitate was then dried using a rotary evaporator under reduced pressure. The yield was 37% (0.045 mol, 10.050 g). A stoichiometric amount of the super acid HTf<sub>2</sub>N (0.045 mol, 14.00 g) was then added (as a 80 wt% solution in H<sub>2</sub>O) to the sulfonate zwitterion and the mixture was stirred for 2 h at 50 °C to obtain the sulfonic acid functionalized ionic liquid [N<sub>222</sub>C<sub>3</sub>SO<sub>3</sub>H][Tf<sub>2</sub>N], in quantitative yield. The product was dried using a Schlenk line.

### **Ionic liquid [N<sub>222</sub>C<sub>3</sub>SO<sub>3</sub>H][Tf<sub>2</sub>N]**

<sup>1</sup>H NMR (300 MHz, δ, D<sub>2</sub>O): 3.20 (6H, m, 3 CH<sub>2</sub>), 2.85 (2H, t, 7.5 Hz, CH<sub>2</sub>), 2.01 (2H, m, CH<sub>2</sub>), 1.15 (9H, t, 7.0 Hz, 3 CH<sub>3</sub>). <sup>13</sup>C NMR (75 MHz, δ, D<sub>2</sub>O): 125.55 (CF<sub>3</sub>), 121.31 (CF<sub>3</sub>), 117.03 (CF<sub>3</sub>), 112.84 (CF<sub>3</sub>), 54.61 (CH<sub>2</sub>), 52.66 (CH<sub>2</sub>), 47.18 (CH<sub>2</sub>), 17.18 (CH<sub>2</sub>), 6.54 (CH<sub>3</sub>).  
CHN analysis: (calculated for C<sub>11</sub>H<sub>22</sub>F<sub>6</sub>N<sub>2</sub>O<sub>7</sub>S<sub>3</sub>): C 26.86% (26.19%), H 4.23% (4.40%), N 5.05% (5.55%).

Glass transition temperature (-57 °C)

Density: 1.55 g·cm<sup>-3</sup> (25 °C)

Viscosity 1463 cP (30 °C) / 79 cP (80 °C)

Degradation temperature: ≈ 275 °C



### 4.3 [N<sub>333</sub>C<sub>3</sub>SO<sub>3</sub>H][Tf<sub>2</sub>N]

Tripropylamine (0.173 mol, 24.85 g) and 1,3-propanesultone (0.163 mol, 19.918 g) were refluxed in acetonitrile for 24 h to obtain the sulfonate zwitterion [N<sub>333</sub>C<sub>3</sub>SO<sub>3</sub>] (homogeneous solution). The acetonitrile was removed using a rotary evaporator under reduced pressure. The zwitterion was then washed with toluene and dried again using a rotary evaporator. The yield was 100% (0.163 mol, 43.33 g).

A stoichiometric amount of the super acid HTf<sub>2</sub>N (0.165 mol, 46.34 g) was then added (as a 80 wt% solution in H<sub>2</sub>O) to the sulfonate zwitterion and the mixture was stirred for 2 h at 50 °C to obtain the sulfonic acid functionalized ionic liquid [N<sub>333</sub>C<sub>3</sub>SO<sub>3</sub>H][Tf<sub>2</sub>N], in quantitative yield. The product was dried using a Schlenk line.

#### **Ionic liquid [N<sub>333</sub>C<sub>3</sub>SO<sub>3</sub>H][Tf<sub>2</sub>N]**

<sup>1</sup>H NMR (300 MHz, δ, D<sub>2</sub>O): 3.28 (2H, m, CH<sub>2</sub>), 3.09 (6H, m, CH<sub>2</sub>), 2.84 (2H, t, 7.0 Hz, CH<sub>2</sub>), 2.03 (2H, m, CH<sub>2</sub>), 1.60 (6H, m, 3 CH<sub>2</sub>), 0.84 (9H, t, 7.0 Hz, 3 CH<sub>3</sub>). <sup>13</sup>C NMR (75 MHz, δ, D<sub>2</sub>O): 125.54 (CF<sub>3</sub>), 121.34 (CF<sub>3</sub>), 117.11 (CF<sub>3</sub>), 112.86 (CF<sub>3</sub>), 59.94 (CH<sub>2</sub>), 57.44 (3 CH<sub>2</sub>), 47.18 (CH<sub>2</sub>), 17.33 (CH<sub>2</sub>), 14.76 (CH<sub>2</sub>), 9.69 (3 CH<sub>3</sub>). CHN analysis: (calculated for C<sub>14</sub>H<sub>28</sub>F<sub>6</sub>N<sub>2</sub>O<sub>7</sub>S<sub>3</sub>·2H<sub>2</sub>O): C 28.65% (28.86%), H 5.84% (5.54%), N 4.77% (4.81%).

Glass transition temperature (-37 °C)

Density: 1.42 g·cm<sup>-3</sup> (25 °C)

Viscosity 10000 cP (30 °C) / 229 cP (80 °C)

Degradation temperature: ≈ 275 °C

#### 4.4 [N<sub>444</sub>C<sub>3</sub>SO<sub>3</sub>H][Tf<sub>2</sub>N]

Tributylamine (0.126 mol, 23.34 g) and 1,3-propanesultone (0.123 mol, 15.00 g) were refluxed in acetonitrile for 72 h to obtain the sulfonate zwitterion [N<sub>444</sub>C<sub>3</sub>SO<sub>3</sub>] (homogeneous solution). The acetonitrile was removed using a rotary evaporator under reduced pressure. The zwitterion was then washed with toluene and dried again using a rotary evaporator. The yield was 100% (0.123 mol, 37.821 g).

A stoichiometric amount of the super acid HTf<sub>2</sub>N (0.126 mol, 35.352 g) was then added (as a 80 wt% solution in H<sub>2</sub>O) to the sulfonate zwitterion and the mixture was stirred for 2 h at 50 °C to obtain the sulfonic acid functionalized ionic liquid [N<sub>444</sub>C<sub>3</sub>SO<sub>3</sub>H][Tf<sub>2</sub>N], in quantitative yield. The product was dried using a Schlenk line.

#### **Ionic liquid [N<sub>444</sub>C<sub>3</sub>SO<sub>3</sub>H][Tf<sub>2</sub>N]**

<sup>1</sup>H NMR (300 MHz, δ, D<sub>2</sub>O): 3.28 (2H, m, CH<sub>2</sub>), 3.13 (6H, m, CH<sub>2</sub>), 2.84 (2H, t, 7.0 Hz, CH<sub>2</sub>), 2.03 (2H, m, CH<sub>2</sub>), 1.56 (6H, m, 3 CH<sub>2</sub>), 1.26 (6H, m, 3 CH<sub>2</sub>), 0.84 (9H, t, 7.5 Hz, 3 CH<sub>3</sub>). <sup>13</sup>C NMR (75 MHz, δ, D<sub>2</sub>O): <sup>13</sup>C NMR (75 MHz, δ, D<sub>2</sub>O): 125.81 (CF<sub>3</sub>), 121.50 (CF<sub>3</sub>), 117.27 (CF<sub>3</sub>), 112.96 (CF<sub>3</sub>), 58.24 (CH<sub>2</sub>), 56.48 (3 CH<sub>2</sub>), 47.15 (CH<sub>2</sub>), 23.08 (CH<sub>2</sub>), 19.00 (CH<sub>2</sub>), 17.42 (CH<sub>2</sub>), 12.71 (3 CH<sub>3</sub>). CHN analysis: (calculated for C<sub>17</sub>H<sub>34</sub>F<sub>6</sub>N<sub>2</sub>O<sub>7</sub>S<sub>3</sub>·2H<sub>2</sub>O): C 32.40% (32.69%), H 6.27% (6.13%), N 4.53% (4.48%).

Glass transition temperature (-40 °C)

Density: 1.35 g·cm<sup>-3</sup> (25 °C)

Viscosity: > 15000 cP (30 °C) / 310 cP (80 °C)

Degradation temperature: ≈ 275 °C

#### 4.5 [N<sub>666</sub>C<sub>3</sub>SO<sub>3</sub>H][Tf<sub>2</sub>N]

Trihexylamine (0.0619 mol, 16.674 g) and 1,3-propanesultone (0.0614 mol, 7.499 g) were refluxed in toluene for 24 h to obtain the sulfonate zwitterion [N<sub>666</sub>C<sub>3</sub>SO<sub>3</sub>] (homogeneous solution). The toluene was removed using a rotary evaporator under reduced pressure and a waxy residue was obtained. This residue was washed by stirring with diethyl ether and then filtering the resulting suspension. The product was further purified by recrystallization from ethyl acetate at -32 °C. This produced a white solid product with a yield of 34% (0.0212 mol, 8.170 g). A stoichiometric amount of the super acid HTf<sub>2</sub>N (0.021 mol, 5.910 g) was then added (as a 80 wt% solution in H<sub>2</sub>O) to the sulfonate zwitterion and the mixture was stirred for 2 h at 50 °C to obtain the sulfonic acid functionalized ionic liquid [N<sub>666</sub>C<sub>3</sub>SO<sub>3</sub>H][Tf<sub>2</sub>N], in quantitative yield. The product was dried using a Schlenk line.

#### **Ionic liquid [N<sub>666</sub>C<sub>3</sub>SO<sub>3</sub>H][Tf<sub>2</sub>N]**

<sup>1</sup>H NMR (300 MHz, δ, CD<sub>2</sub>Cl<sub>2</sub>): 3.40 (2H, m, CH<sub>2</sub>), 3.17 (8H, m, 4 CH<sub>2</sub>), 2.20 (2H, m, CH<sub>2</sub>), 1.66 (6H, m, 3 CH<sub>2</sub>), 1.38 (18H, m, 9 CH<sub>2</sub>), 0.94 (9H, t, 7.0 Hz, 3 CH<sub>3</sub>). <sup>13</sup>C NMR (75 MHz, δ, CD<sub>3</sub>Cl): 125.91 (CF<sub>3</sub>), 121.67 (CF<sub>3</sub>), 122.07 (CF<sub>3</sub>), 117.84 (CF<sub>3</sub>), 58.98 (CH<sub>2</sub>), 56.72 (CH<sub>2</sub>), 47.38 (CH<sub>2</sub>), 38.87 (CH<sub>2</sub>), 30.87 (CH<sub>2</sub>), 25.64 (CH<sub>2</sub>), 22.54 (CH<sub>2</sub>), 21.63 (CH<sub>2</sub>), 17.32 (CH<sub>2</sub>), 13.54 (CH<sub>2</sub>). CHN analysis: (calculated for C<sub>23</sub>H<sub>46</sub>F<sub>6</sub>N<sub>2</sub>O<sub>7</sub>S<sub>3</sub>·8H<sub>2</sub>O): C 32.78% (33.82%), H 6.03% (7.65%), N 4.04% (3.43%). The slightly large than usual deviations are due to the lower purity of the trihexylamine starting product (96%) which contains amines with different alkyl chain lengths as impurities.

Glass transition temperature (-61 °C)

Density: 1.32 g·cm<sup>-3</sup> (25 °C)

Viscosity 1347 cP (30 °C) / 111 cP (80 °C)

Degradation temperature: ≈ 270 °C

#### 4.6 [N<sub>888</sub>C<sub>3</sub>SO<sub>3</sub>H][Tf<sub>2</sub>N]

Trioctylamine (0.0618 mol, 21.84 g) and 1,3-propanesultone (0.0614 mol, 7.449 g) were refluxed in toluene for 72 h to obtain the sulfonate zwitterion [N<sub>888</sub>C<sub>3</sub>SO<sub>3</sub>] (homogeneous solution). The toluene was removed using a rotary evaporator under reduced pressure and a waxy residue was obtained. This residue was washed by stirring with diethyl ether and then filtering the resulting suspension. The resulting white powder product was collected with a yield of 54% (0.0329 mol, 15.649 g).

A stoichiometric amount of the super acid HTf<sub>2</sub>N (0.0399 mol, 11.22 g) was then added (as a 80 wt% solution in H<sub>2</sub>O) to the sulfonate zwitterion and the mixture was stirred for 2 h at 50 °C to obtain the sulfonic acid functionalized ionic liquid [N<sub>888</sub>C<sub>3</sub>SO<sub>3</sub>H][Tf<sub>2</sub>N], in quantitative yield. The product was dried using a Schlenk line.

#### **Ionic liquid [N<sub>888</sub>C<sub>3</sub>SO<sub>3</sub>H][Tf<sub>2</sub>N]**

<sup>1</sup>H NMR (300 MHz, δ, CD<sub>2</sub>Cl<sub>2</sub>): 3.39 (2H, m, CH<sub>2</sub>), 3.16 (8H, m, 4 CH<sub>2</sub>), 2.22 (2H, m, CH<sub>2</sub>), 1.67 (6H, m, 3 CH<sub>2</sub>), 1.35 (30H, m, 15 CH<sub>2</sub>), 0.92 (9H, t, 7.0 Hz, 3 CH<sub>3</sub>). <sup>13</sup>C NMR (75 MHz, δ, CD<sub>3</sub>Cl): 125.86.09 (CF<sub>3</sub>), 121.66 (CF<sub>3</sub>), 117.42 (CF<sub>3</sub>), 113.12 (CF<sub>3</sub>), 58.93 (CH<sub>2</sub>), 59.05 (CH<sub>2</sub>), 56.64 (CH<sub>2</sub>), 53.40 (CH<sub>2</sub>), 47.59 (CH<sub>2</sub>), 31.56 (CH<sub>2</sub>), 30.78 (CH<sub>2</sub>), 28.77 (CH<sub>2</sub>), 26.43 (CH<sub>2</sub>), 25.98 (CH<sub>2</sub>), 23.47 (CH<sub>2</sub>), 22.46 (CH<sub>2</sub>), 21.62 (CH<sub>2</sub>), 17.27 (CH<sub>2</sub>), 13.86 (CH<sub>3</sub>). CHN analysis: (calculated for C<sub>29</sub>H<sub>58</sub>F<sub>6</sub>N<sub>2</sub>O<sub>7</sub>S<sub>3</sub>·8H<sub>2</sub>O): C 37.98% (38.65%), H 7.20% (8.28%), N 3.58% (3.11%).

Glass transition temperature (-61 °C)

Density: 1.17 g·cm<sup>-3</sup> (25 °C)

Viscosity 1703 cP (30 °C) / 125 cP (80 °C)

Degradation temperature: ≈ 265 °C

#### 4.7 [PPh<sub>3</sub>C<sub>3</sub>SO<sub>3</sub>H][Tf<sub>2</sub>N]

Triphenylphosphine (0.0615 mol, 16.134 g) and 1,3-propanesultone (0.0615 mol, 7.517 g) were refluxed in toluene for 24 h to obtain the sulfonate zwitterion [PPh<sub>3</sub>C<sub>3</sub>SO<sub>3</sub>] as an orange precipitate. The precipitate was washed with toluene and dried using a rotary evaporator. The resulting orange powder product was collected with a yield of 43% (0.0265 mol, 10.196 g).

A stoichiometric amount of the super acid HTf<sub>2</sub>N (0.0285 mol, 8.023 g) was then added (as a 80 wt% solution in H<sub>2</sub>O) to the sulfonate zwitterion and the mixture was stirred for 2 h at 50 °C to obtain the sulfonic acid functionalized ionic liquid [PPh<sub>3</sub>C<sub>3</sub>SO<sub>3</sub>H][Tf<sub>2</sub>N], in quantitative yield. The product was dried using a Schlenk line.

#### **Ionic liquid [PPh<sub>3</sub>C<sub>3</sub>SO<sub>3</sub>H][Tf<sub>2</sub>N]**

<sup>1</sup>H NMR (300 MHz, δ, D<sub>2</sub>O): 7.59 (15H, m, 3 phenyl), 3.33 (2H, m, CH<sub>3</sub>), 2.90 (2H, t, 7.0 Hz, CH<sub>2</sub>), 1.96 (2H, m, CH<sub>2</sub>). <sup>13</sup>C NMR (75 MHz, δ, D<sub>2</sub>O): 135.08 (phenyl), 133.49 (phenyl), 130.97 (phenyl), 121.01 (phenyl), 121.32 (CF<sub>3</sub>), 118.02 (CF<sub>3</sub>), 116.94 (CF<sub>3</sub>), 113.81 (CF<sub>3</sub>), 50.34 (CH<sub>3</sub>), 20.28 (CH<sub>2</sub>), 17.9 (CH<sub>2</sub>). CHN analysis: (calculated for C<sub>23</sub>H<sub>22</sub>F<sub>6</sub>NO<sub>7</sub>PS<sub>3</sub>·3H<sub>2</sub>O): C 38.05% (38.39%), H 4.00% (3.92%), N 2.24% (1.95%).

Glass transition temperature (-39 °C)

Density: 1.50 g·cm<sup>-3</sup> (25 °C)

Viscosity > 20000 cP (30 °C) / 482 cP (80 °C)

Degradation temperature: ≈ 319 °C

#### 4.8 [P<sub>444</sub>C<sub>3</sub>SO<sub>3</sub>H][Tf<sub>2</sub>N]

Tributylphosphine (0.124 mol, 25.10 g) and 1,3-propanesultone (0.121 mol, 14.798 g) were refluxed in acetonitrile for 72 h (N<sub>2</sub> atmosphere) to obtain the sulfonate zwitterion [P<sub>444</sub>C<sub>3</sub>SO<sub>3</sub>] (homogeneous solution). The acetonitrile was removed using a rotary evaporator under reduced pressure. The resulting (liquid) zwitterion was washed by stirring with diethyl ether and then decanting the resulting suspension. The resulting (liquid) product was collected with a yield of 100% (0.121 mol, 39.280 g).

A stoichiometric amount of the super acid HTf<sub>2</sub>N (0.125 mol, 35.000 g) was then added (as a 80 wt% solution in H<sub>2</sub>O) to the sulfonate zwitterion and the mixture was stirred for 2 h at 50 °C to obtain the sulfonic acid functionalized ionic liquid [P<sub>444</sub>C<sub>3</sub>SO<sub>3</sub>H][Tf<sub>2</sub>N], in quantitative yield. The product was dried using a Schlenk line.

#### **Ionic liquid [P<sub>444</sub>C<sub>3</sub>SO<sub>3</sub>H][Tf<sub>2</sub>N]**

<sup>1</sup>H NMR (300 MHz, δ, CD<sub>2</sub>Cl<sub>2</sub>): 3.31 (2H, t, 7.0 Hz, CH<sub>2</sub>), 2.39 (2H, m, CH<sub>2</sub>), 2.13 (8H, m, 4 CH<sub>2</sub>), 1.54 (12H, m, 6 CH<sub>2</sub>), 1.00 (9H, t, 7.0 Hz, 3 CH<sub>3</sub>). <sup>13</sup>C NMR (75 MHz, δ, CD<sub>2</sub>Cl<sub>2</sub>): 126.34 (CF<sub>3</sub>), 122.11 (CF<sub>3</sub>), 117.87 (CF<sub>3</sub>), 113.63 (CF<sub>3</sub>), 51.46 (CH<sub>2</sub>), 51.23 (CH<sub>2</sub>), 32.82 (CH<sub>2</sub>), 24.24 (CH<sub>2</sub>), 23.98 (CH<sub>2</sub>), 23.61 (CH<sub>2</sub>), 18.85 (CH<sub>2</sub>), 18.26 (CH<sub>2</sub>), 17.51 (CH<sub>2</sub>), 17.08 (CH<sub>2</sub>), 13.24 (CH<sub>3</sub>). CHN analysis: (calculated for C<sub>17</sub>H<sub>34</sub>F<sub>6</sub>NO<sub>7</sub>PS<sub>3</sub>·3H<sub>2</sub>O): C 30.12% (30.95%), H 5.96% (6.11%), N 2.47% (2.12%).

Glass transition temperature (-50 °C)

Density: 1.36 g·cm<sup>-3</sup> (25 °C)

Viscosity 1888 cP (30 °C) / 119 cP (80 °C)

Degradation temperature: ≈ 307 °C

#### 4.9 [P<sub>666</sub>C<sub>3</sub>SO<sub>3</sub>H][Tf<sub>2</sub>N]

Trihexylphosphine (0.00579 mol, 1.66 g) and 1,3-propanesultone (0.00589 mol, 0.720 g) were refluxed in toluene (90 °C) for 72 h (under N<sub>2</sub> atmosphere) to obtain the sulfonate zwitterion [P<sub>666</sub>C<sub>3</sub>SO<sub>3</sub>] (homogeneous solution). The toluene was removed using a rotary evaporator under reduced pressure. This produced a liquid product with a yield of 95% (0.00558 mol, 2.278 g). A stoichiometric amount of the super acid HTf<sub>2</sub>N (0.00597 mol, 1.68 g) was then added (as a 80 wt% solution in H<sub>2</sub>O) to the sulfonate zwitterion and the mixture was stirred for 2 h at 50 °C to obtain the sulfonic acid functionalized ionic liquid [P<sub>666</sub>C<sub>3</sub>SO<sub>3</sub>H][Tf<sub>2</sub>N], in quantitative yield. The product was dried using a Schlenk line.

#### **Ionic liquid [P<sub>666</sub>C<sub>3</sub>SO<sub>3</sub>H][Tf<sub>2</sub>N]**

<sup>1</sup>H NMR (300 MHz, δ, CD<sub>2</sub>Cl<sub>2</sub>): 3.30 (2H, t, 7.0 Hz, CH<sub>2</sub>), 2.40 (2H, m, CH<sub>2</sub>), 2.14 (8H, m, 4 CH<sub>2</sub>), 1.53 (12H, m, 6 CH<sub>2</sub>), 1.37 (12H, m, 6 CH<sub>2</sub>), 0.94 (9H, t, 7.0 Hz 3 CH<sub>3</sub>). <sup>13</sup>C NMR (75 MHz, δ, CD<sub>2</sub>Cl<sub>2</sub>): 126.45 (CF<sub>3</sub>), 121.16 (CF<sub>3</sub>), 117.90 (CF<sub>3</sub>), 113.63 (CF<sub>3</sub>), 51.53 (CH<sub>2</sub>), 51.30 (CH<sub>2</sub>), 44.58 (CH<sub>2</sub>), 31.29 (CH<sub>2</sub>), 31.18 (CH<sub>2</sub>), 30.50 (CH<sub>2</sub>), 30.36 (CH<sub>2</sub>), 24.72 (CH<sub>2</sub>), 24.07 (CH<sub>2</sub>), 23.82 (CH<sub>2</sub>), 22.65 (CH<sub>2</sub>), 21.71 (CH<sub>2</sub>), 21.02 (CH<sub>2</sub>), 19.21 (CH<sub>2</sub>), 18.58 (CH<sub>2</sub>), 18.25 (CH<sub>2</sub>), 17.62 (CH<sub>2</sub>), 17.17 (CH<sub>2</sub>), 13.99 (CH<sub>3</sub>). CHN analysis: (calculated for C<sub>23</sub>H<sub>46</sub>F<sub>6</sub>NO<sub>7</sub>PS<sub>3</sub>·3H<sub>2</sub>O): C 37.14% (37.14%), H 6.74% (7.05%), N 2.12% (1.88%).

Glass transition temperature (-64 °C)

Density: 1.26 g·cm<sup>-3</sup> (25 °C)

Viscosity 621 cP (30 °C) / 62 cP (80 °C)

Degradation temperature: ≈ 300 °C

#### 4.10 [P<sub>888</sub>C<sub>3</sub>SO<sub>3</sub>H][Tf<sub>2</sub>N]

Trioctylphosphine (0.0626 mol, 23.21 g) and 1,3-propanesultone (0.0615 mol, 7.510 g) were refluxed in toluene (90 °C) for 72 h (under N<sub>2</sub> atmosphere) to obtain the sulfonate zwitterion [P<sub>888</sub>C<sub>3</sub>SO<sub>3</sub>] (precipitate). The toluene was removed using a rotary evaporator under reduced pressure and the zwitterion powder was washed with diethyl ether. The resulting white powder product was collected with a yield of 90% (0.0552 mol, 27.182 g).

A stoichiometric amount of the super acid HTf<sub>2</sub>N (0.0622 mol, 17.478 g) was then added (as a 80 wt% solution in H<sub>2</sub>O) to the sulfonate zwitterion and the mixture was stirred for 2 h at 50 °C to obtain the sulfonic acid functionalized ionic liquid [P<sub>888</sub>C<sub>3</sub>SO<sub>3</sub>H][Tf<sub>2</sub>N], in quantitative yield. The product was dried using a Schlenk line.

#### **Ionic liquid [P<sub>888</sub>C<sub>3</sub>SO<sub>3</sub>H][Tf<sub>2</sub>N]**

<sup>1</sup>H NMR (300 MHz, δ, CD<sub>2</sub>Cl<sub>2</sub>): 3.35 (2H, t, 7.0 Hz, CH<sub>2</sub>), 2.39 (2H, m, CH<sub>2</sub>), 2.13 (8H, m, 4 CH<sub>2</sub>), 1.53 (12H, m, 6 CH<sub>2</sub>), 1.33 (24H, m, 12 CH<sub>2</sub>), 0.93 (9H, t, 7.0 Hz 3 CH<sub>3</sub>). <sup>13</sup>C NMR (75 MHz, δ, CD<sub>2</sub>Cl<sub>2</sub>): 126.34 (CF<sub>3</sub>), 122.01 (CF<sub>3</sub>), 117.86 (CF<sub>3</sub>), 113.63 (CF<sub>3</sub>), 51.59 (CH<sub>2</sub>), 51.37 (CH<sub>2</sub>), 32.03 (CH<sub>2</sub>), 31.04 (CH<sub>2</sub>), 30.83 (CH<sub>2</sub>), 29.28 (CH<sub>2</sub>), 29.04 (CH<sub>2</sub>), 22.95 (CH<sub>2</sub>), 21.76 (CH<sub>2</sub>), 19.19 (CH<sub>2</sub>), 18.57 (CH<sub>2</sub>), 18.25 (CH<sub>2</sub>), 17.62 (CH<sub>2</sub>), 17.13 (CH<sub>2</sub>), 14.18 (CH<sub>3</sub>).  
CHN analysis: (calculated for C<sub>29</sub>H<sub>58</sub>F<sub>6</sub>NO<sub>7</sub>PS<sub>3</sub>·3H<sub>2</sub>O): C 41.55% (42.07%), H 7.40% (7.79%), N 2.01% (1.69%).

Glass transition temperature (-56 °C)

Density: 1.20 g·cm<sup>-3</sup> (25 °C)

Viscosity 1916 cP (30 °C) / 116 cP (80 °C)

Degradation temperature: ≈ 320 °C



## 5. Thermogravimetric analysis (TGA)

Thermogravimetric analysis (TGA) was carried out to determine the thermal stability of the different ionic liquids (Figure S 1). The measurements were done on a TA Instruments T500 thermogravimeter (heating rate: 5 °C min<sup>-1</sup> from room temperature to 400 °C, in a nitrogen atmosphere). Most of the ILs still contain around 5-10 wt% of hydration water even after extensive drying. This is also reflected in the molar equivalents of water that were determined by CHN analysis.

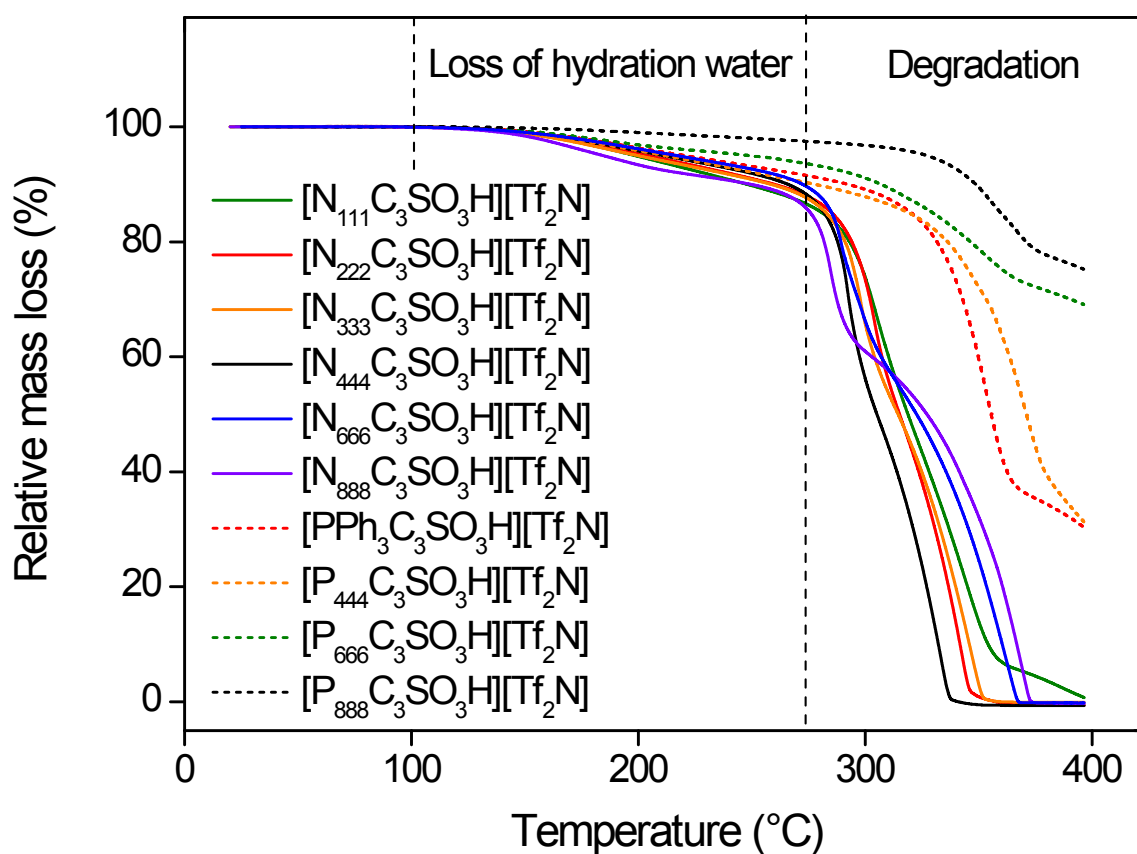

Figure S 1. Thermogravimetric analysis for the different synthesized ionic liquids (5 °C/min, N<sub>2</sub> atmosphere).

## 6. Effect of water on the viscosity of the ILs

Increasing amounts of water were added to the ionic liquid  $[N_{111}C_3SO_3H][Tf_2N]$  to test the effect on the viscosity (50 °C) (Figure S 2).

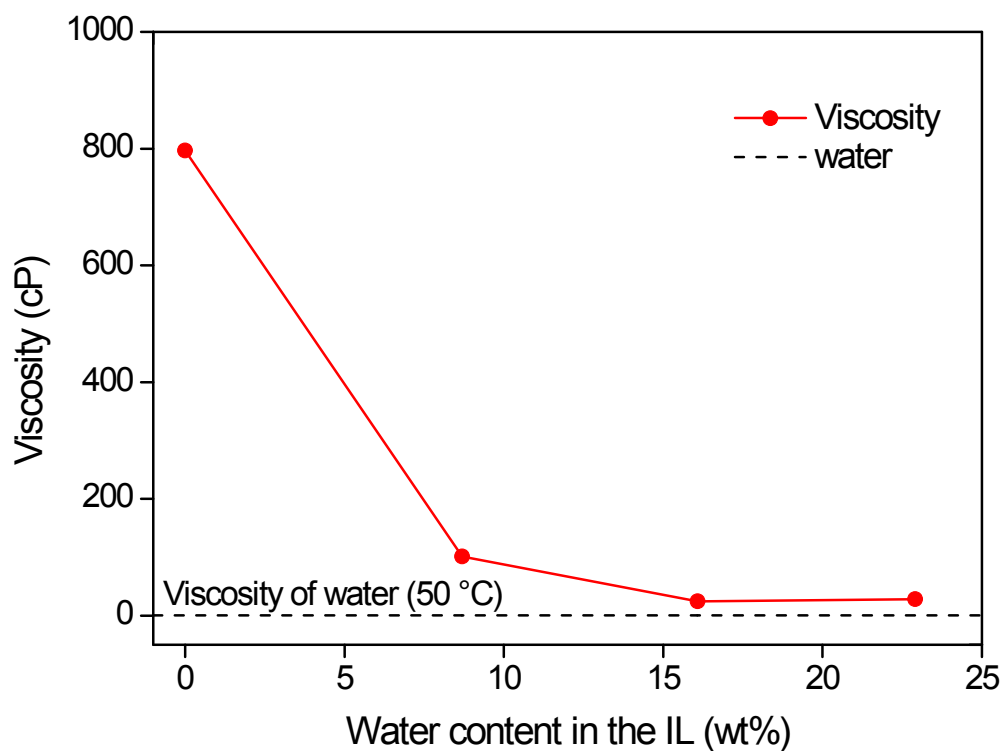

Figure S 2. Effect of the water content (wt%) on the viscosity of the ionic liquid  $[N_{111}C_3SO_3H][Tf_2N]$  at 50 °C.
